# Supplementary material
Source: MDPI journal article supplement (https://www.mdpi.com/2072-6694/15/4/1204)
Supplement: s1 [file s1]

Archive with 2 entries (2 files):
- Supplementary Figures S1-S4.pdf
- Supplementary Figures S5-S9.pdf
